# Supplementary material for: Study on the unsteady state oxidative coupling of methane: effects of oxygen species from O2, surface lattice oxygen, and CO2 on the C2+ selectivity
Source: Royal Society of Chemistry journal article supplement (doi:10.1039/d0ra06065h), 2020-01-01
Supplement: d0ra06065h1.pdf [file d0ra06065h1.pdf]

## Supplementary Information

Study on the unsteady state oxidative coupling of methane: Effects of oxygen species from O<sub>2</sub>, surface lattice oxygen, and CO<sub>2</sub> on the selectivity

### Table of contents

Fig. S1. (a) Schematic reaction system and (b, c) the manufactured quartz reactors.

Fig. S2. Temperature profile of the catalyst bed at the furnace temperature of 750 °C, 800 °C, and 850 °C. A thermocouple was directly positioned at the top, middle, and bottom of the bed.

Fig. S3. (a, b) Ratios of olefins/paraffins and CO/CO<sub>2</sub>, and (c, d) oxygen consumption for the dehydrogenation of ethane (or propane) and the oxidation of CO, depending on the content of N<sub>2</sub> diluent under (a, c) 750 °C and (b, d) 850 °C.

Fig. S4. (a, b) Ratios of olefins/paraffins and CO/CO<sub>2</sub>, and (c, d) oxygen consumption for the dehydrogenation of ethane (or propane) and the oxidation of CO, at various GHSV and catalyst bed thickness under (a, c) 750 °C and (b, d) 850 °C.

Fig. S5. (a, b) Ratios of olefins/paraffins and CO/CO<sub>2</sub>, and (c, d) oxygen consumption for the dehydrogenation of ethane (or propane) and the oxidation of CO, at various GHSV and total flow rate of the feed gas under (a, c) 750 °C and (b, d) 850 °C.

Fig. S6. (a, b) Ratios of olefins/paraffins and CO/CO<sub>2</sub>, and (c, d) oxygen consumption for the dehydrogenation of ethane (or propane) and the oxidation of CO, at 16% CO<sub>2</sub> co-dilution and various GHSV and catalyst bed thickness under (a, c) 750 °C and (b, d) 850 °C.

Fig. S7. C<sub>2+</sub> yield depending on CH<sub>4</sub> conversion and O<sub>2</sub> conversion. All results with O<sub>2</sub> conversion < 100% reported herein are included.

Fig. S8. (a) XRD and (b) Raman spectra of catalysts depending on the heating temperature. The results of fresh catalysts at room temperature depicted for comparison.

Fig. S9. Activities of various catalysts for the OCM reaction in terms of (a) CH<sub>4</sub> conversion and (b) C<sub>2+</sub> selectivity. CH<sub>4</sub>/O<sub>2</sub> = 3 mol/mol, GHSV = 10,000 h<sup>-1</sup>.

Fig. S10. XPS results of fresh and spent  $\text{Na}_2\text{WO}_4/\text{Mn}/\text{SiO}_2$  catalysts.

Table S1. OCM reaction results at various  $\text{CH}_4/\text{O}_2$  ratios.

Table S2. OCM reaction results at various contents of  $\text{N}_2$  diluent.

Table S3. OCM reaction results at various GHSV adjusted by the catalyst bed thickness.

Table S4.  $\text{O}_2$  consumption for the selectivity at various GHSV adjusted by the catalyst bed thickness.

Table S5. OCM reaction results at various GHSV adjusted by the total feed flow rate.

Table S6.  $\text{O}_2$  consumption for the selectivity at various GHSV adjusted by the total feed flow rate.

Table S7. OCM results with co-fed  $\text{CO}_2$  at various GHSV and catalyst bed thickness.

Table S8.  $\text{O}_2$  consumption for the selectivity with co-fed  $\text{CO}_2$  at various GHSV adjusted by the catalyst bed thickness.

Table S9. Observed XPS binding energies (eV) and near-surface compositions (atom%) of the  $\text{Na}_2\text{WO}_4/\text{Mn}/\text{SiO}_2$  catalysts.

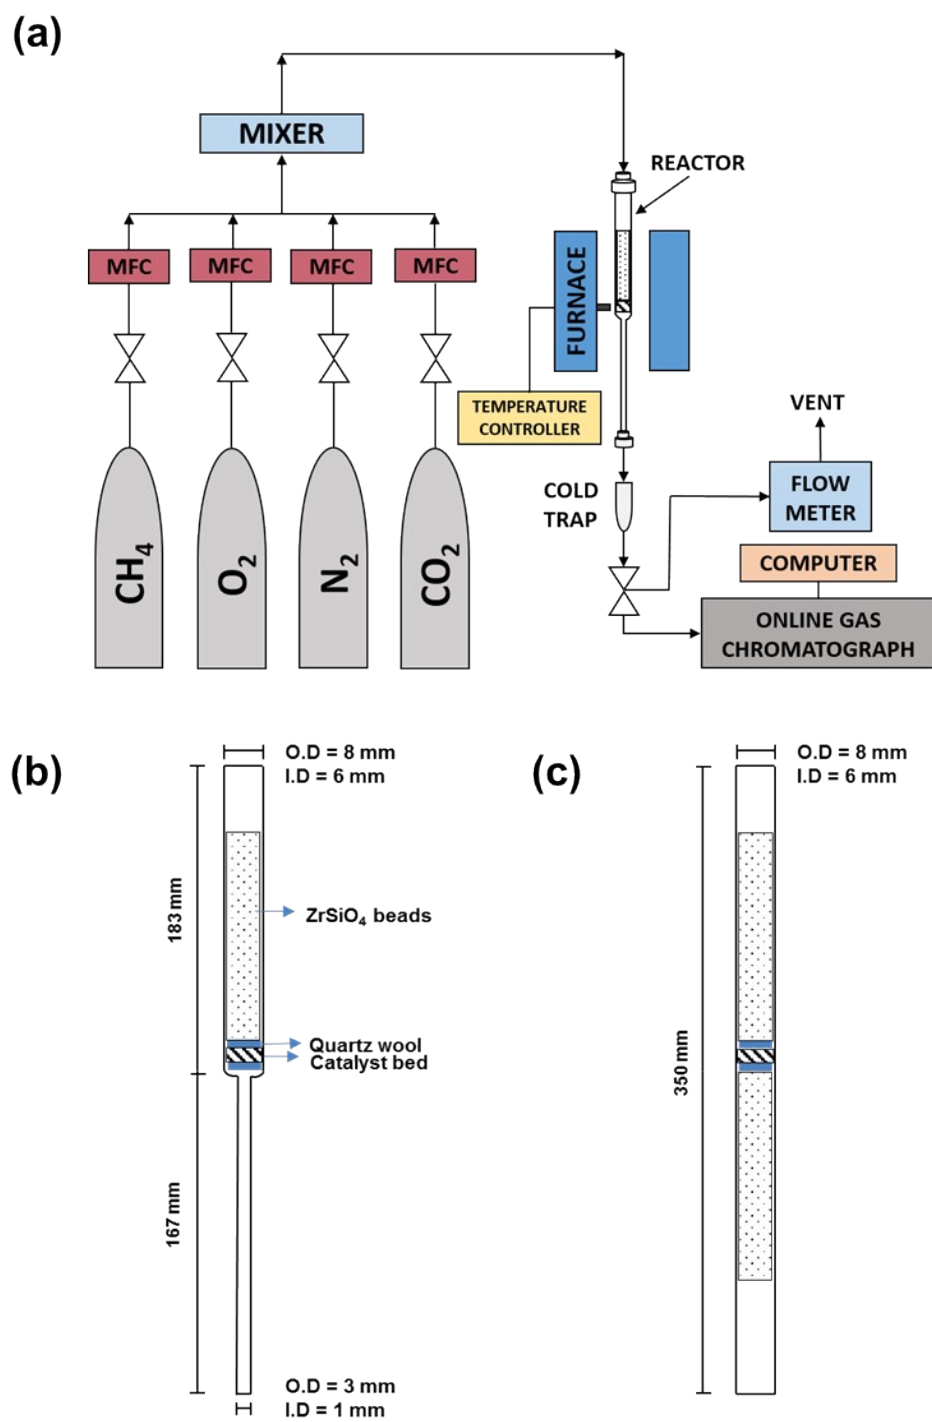

Fig. S1. (a) Schematic reaction system and (b, c) the manufactured quartz reactors.

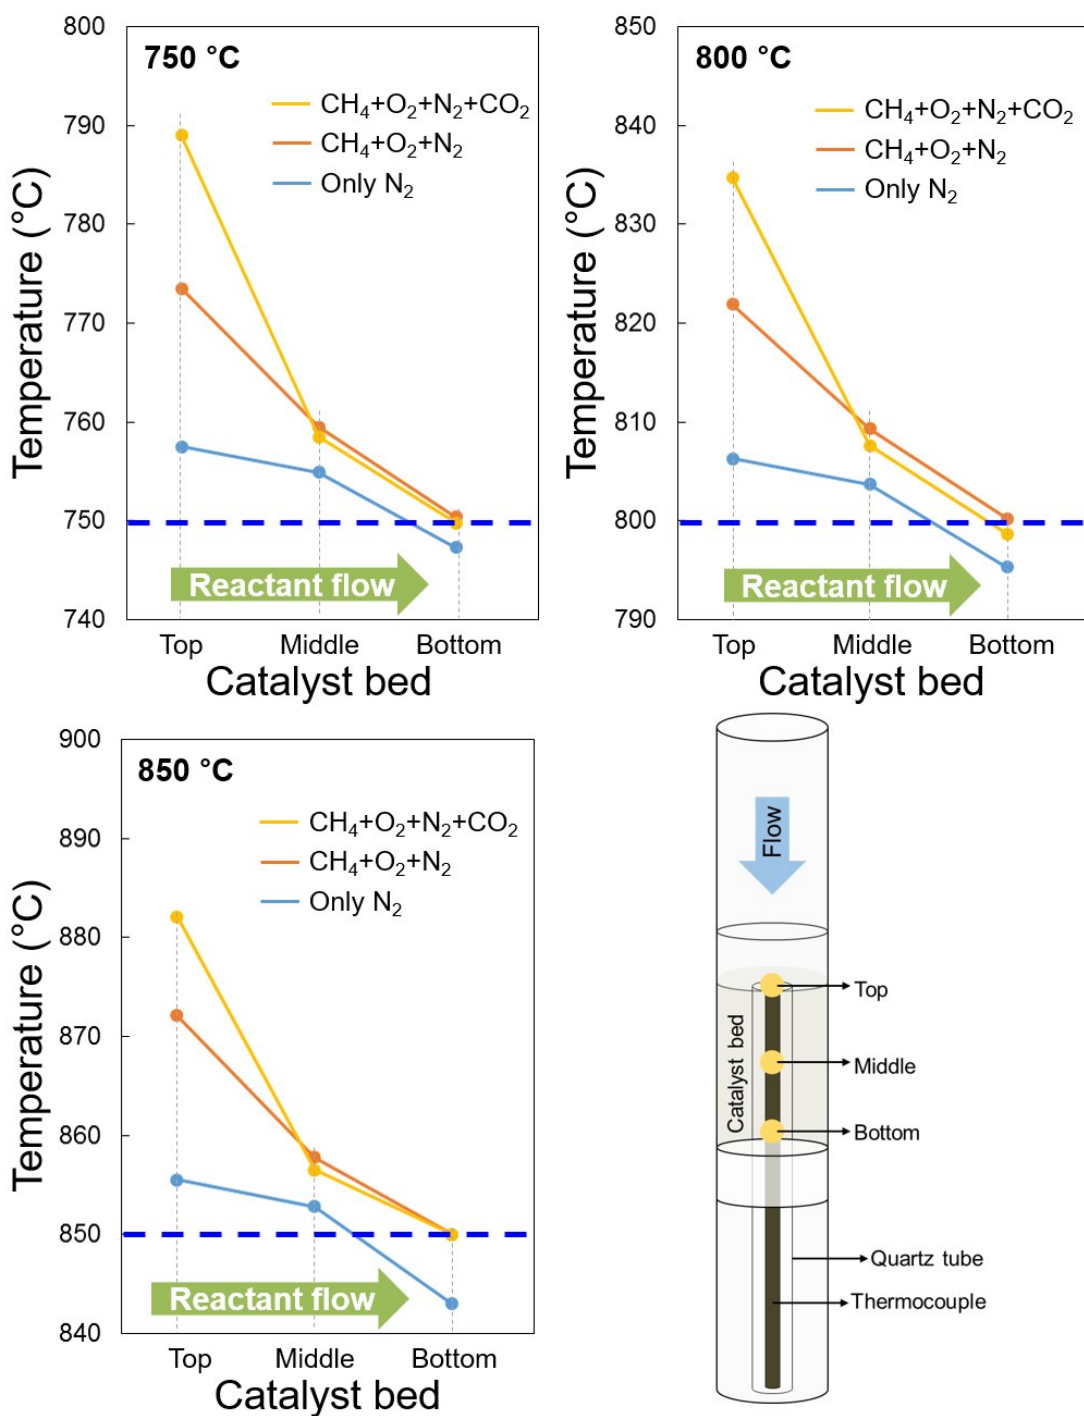

Fig. S2. Temperature profile of the catalyst bed at the furnace temperature of 750 °C, 800 °C, and 850 °C. The blue dotted lines indicate the furnace temperatures. A thermocouple was directly positioned at the top, middle, and bottom of the bed. Catalyst bed thickness = 35.3 mm. CH<sub>4</sub>/O<sub>2</sub>/N<sub>2</sub>/CO<sub>2</sub> = 3/1/1/0 (for CH<sub>4</sub>+O<sub>2</sub>+N<sub>2</sub>), 3/1/0.2/0.8 (for CH<sub>4</sub>+O<sub>2</sub>+N<sub>2</sub>+CO<sub>2</sub>).

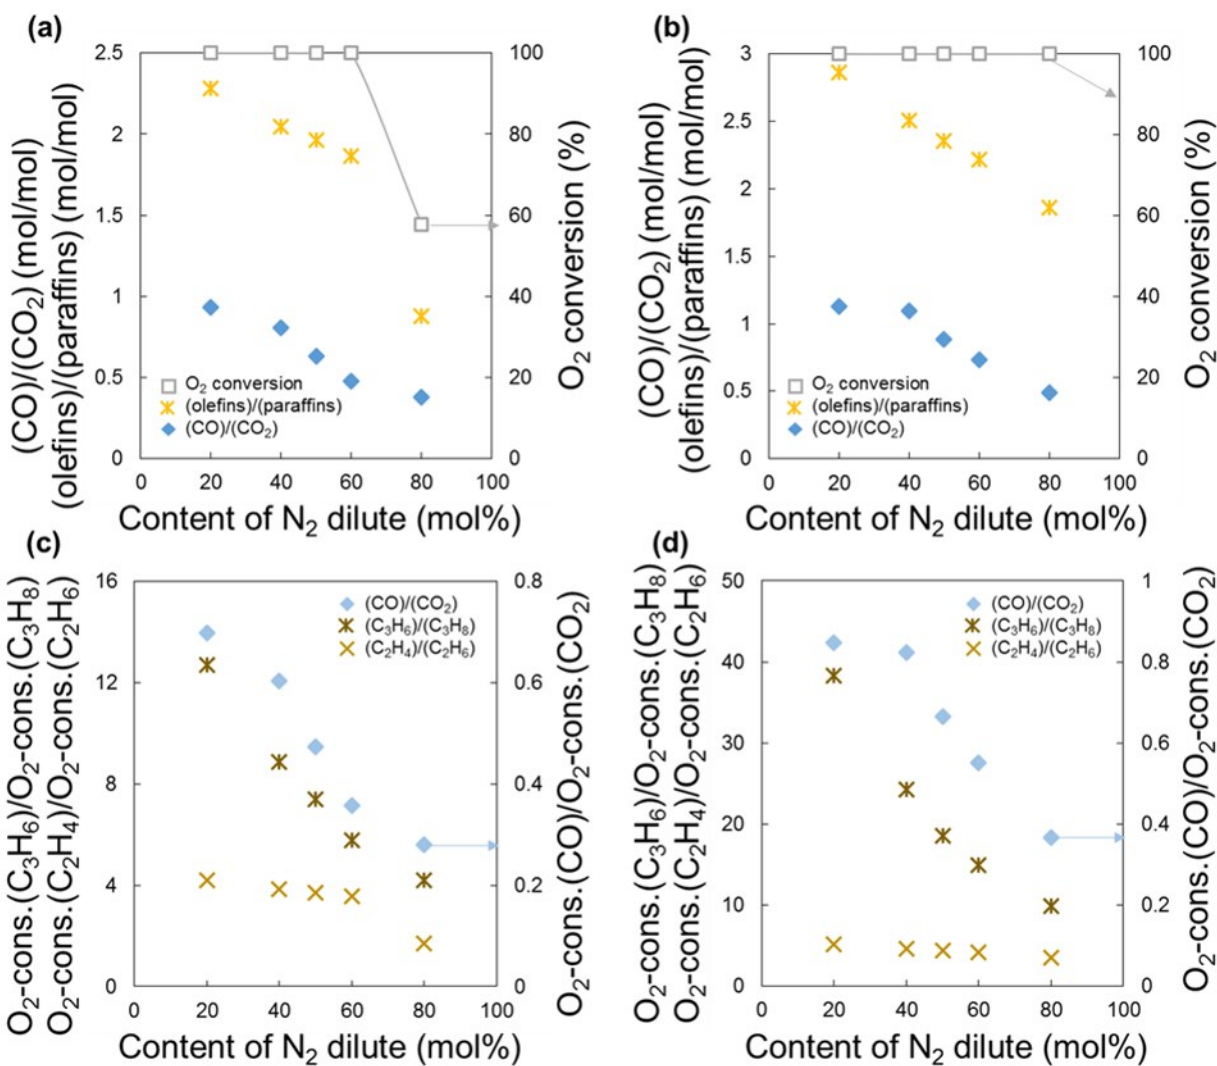

Fig. S3. (a, b) Ratios of olefins/paraffins and CO/CO<sub>2</sub>, and (c, d) oxygen consumption for the dehydrogenation of ethane (or propane) and the oxidation of CO, depending on the content of N<sub>2</sub> diluent under (a, c) 750 °C and (b, d) 850 °C.

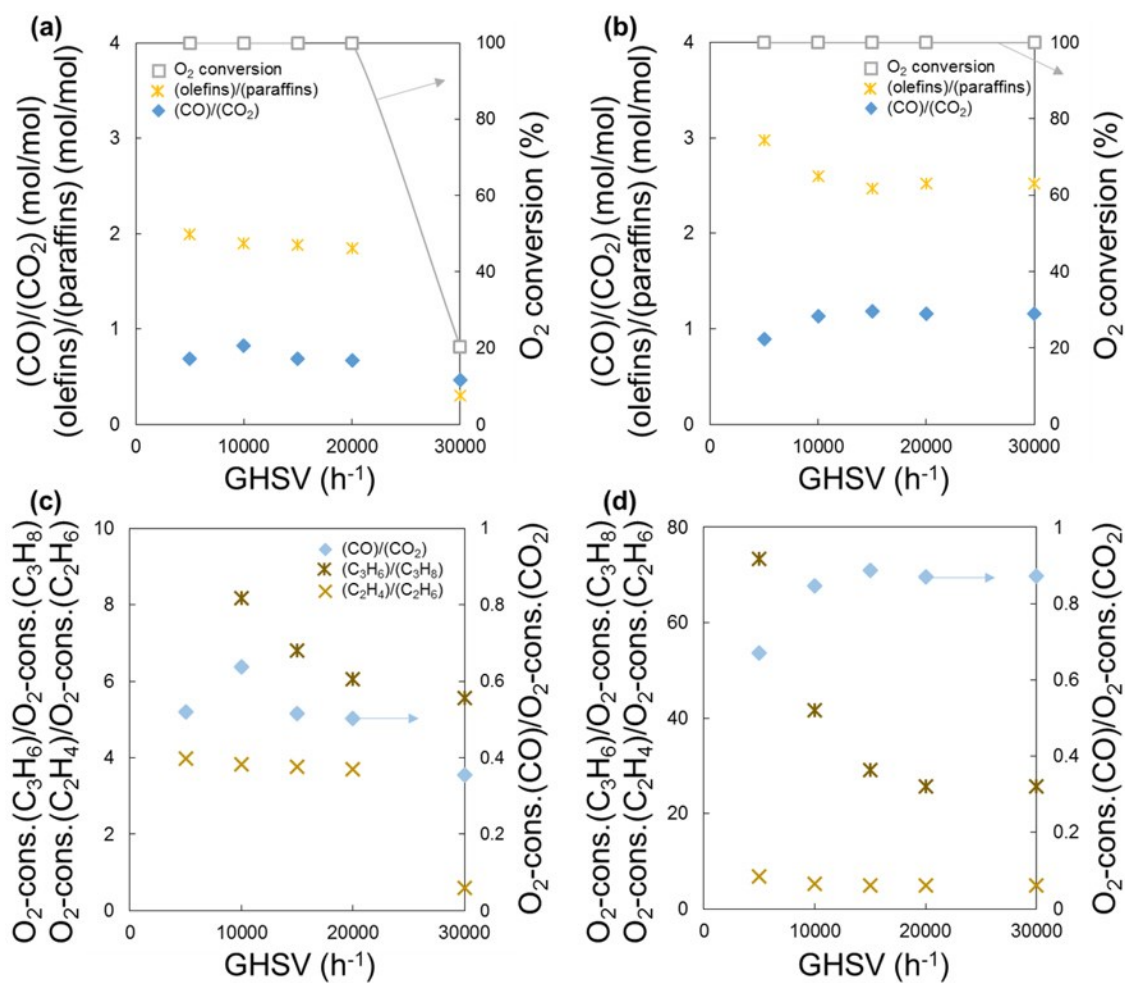

Fig. S4. (a, b) Ratios of olefins/paraffins and CO/CO<sub>2</sub>, and (c, d) oxygen consumption for the dehydrogenation of ethane (or propane) and the oxidation of CO, at various GHSV and catalyst bed thickness with a fixed flow rate under (a, c) 750 °C and (b, d) 850 °C.

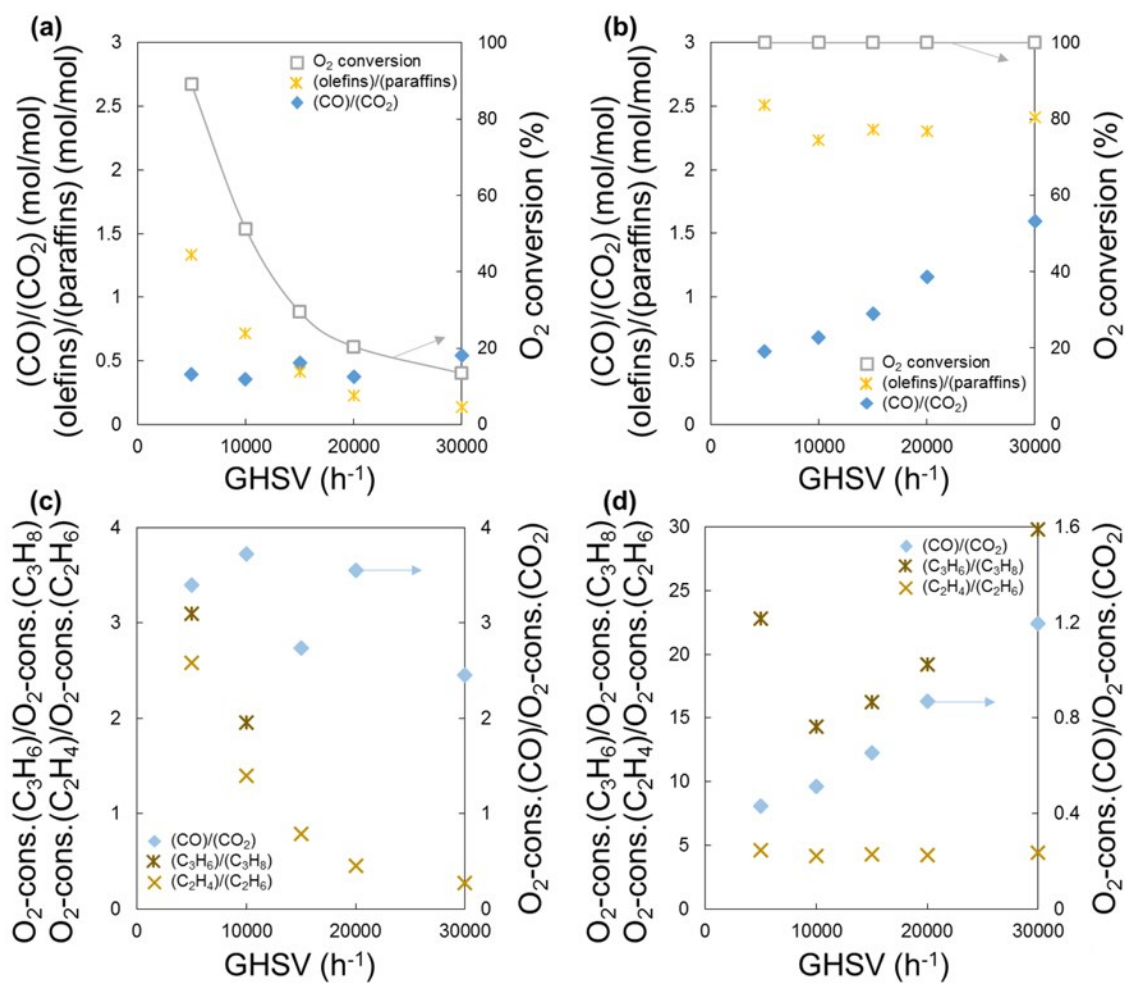

Fig. S5. (a, b) Ratios of olefins/paraffins and CO/CO<sub>2</sub>, and (c, d) oxygen consumption for the dehydrogenation of ethane (or propane) and the oxidation of CO, at various GHSV and total flow rate of the feed gas with a fixed catalyst bed thickness under (a, c) 750 °C and (b, d) 850 °C.

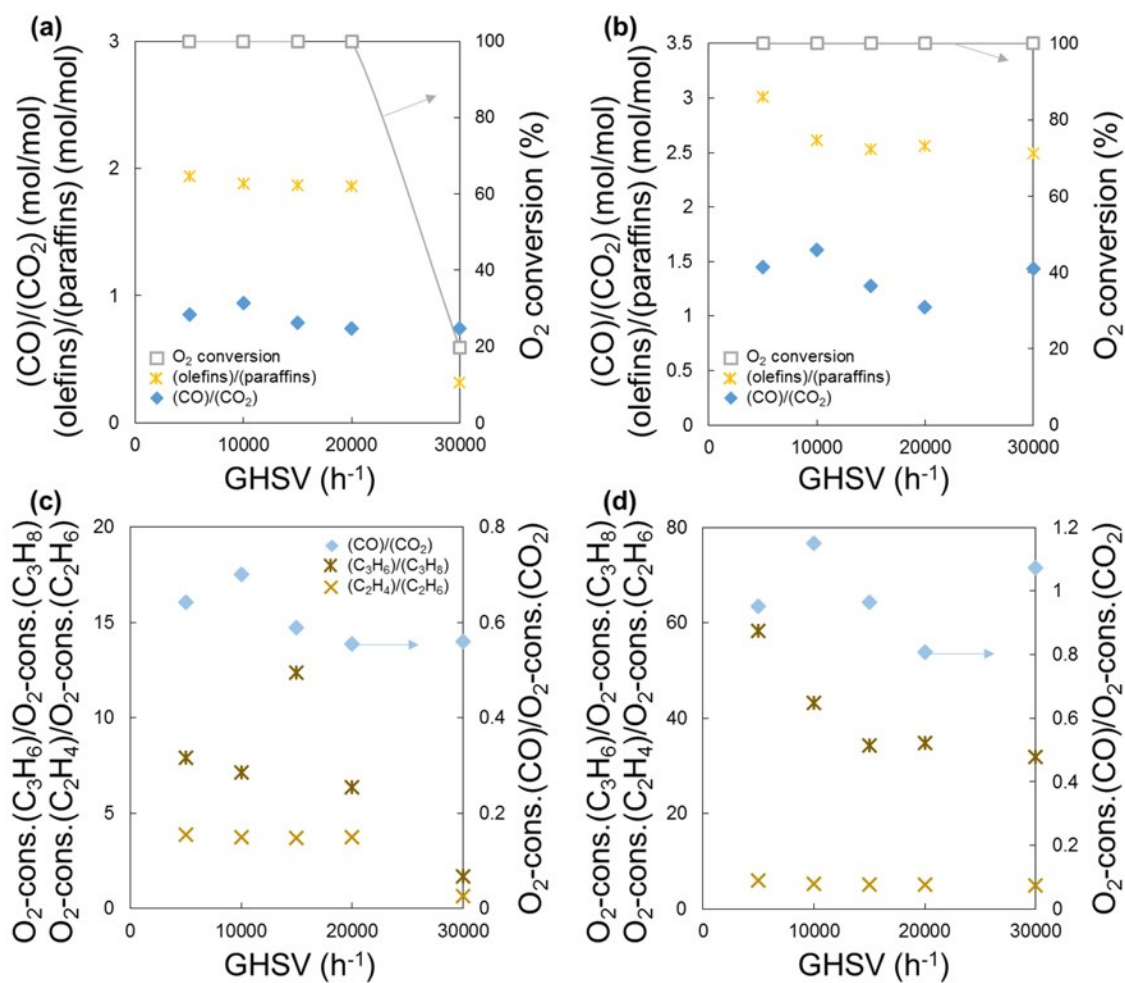

Fig. S6. (a, b) Ratios of olefins/paraffins and CO/CO<sub>2</sub>, and (c, d) oxygen consumption for the dehydrogenation of ethane (or propane) and the oxidation of CO, at 16% CO<sub>2</sub> co-dilution and various GHSV and catalyst bed thickness under (a, c) 750 °C and (b, d) 850 °C.



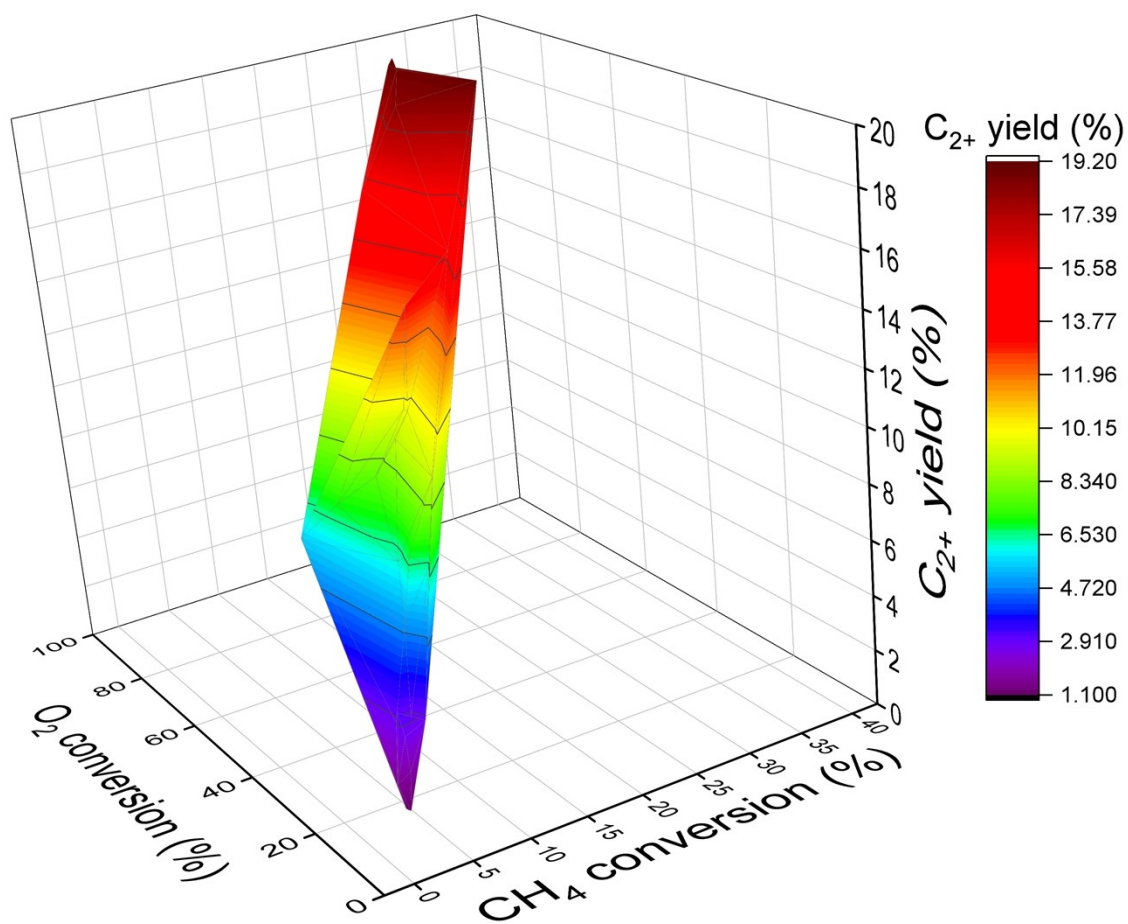

Fig. S7.  $\text{C}_{2+}$  yield depending on  $\text{CH}_4$  conversion and  $\text{O}_2$  conversion. All results with  $\text{O}_2$  conversion < 100% reported herein are included.

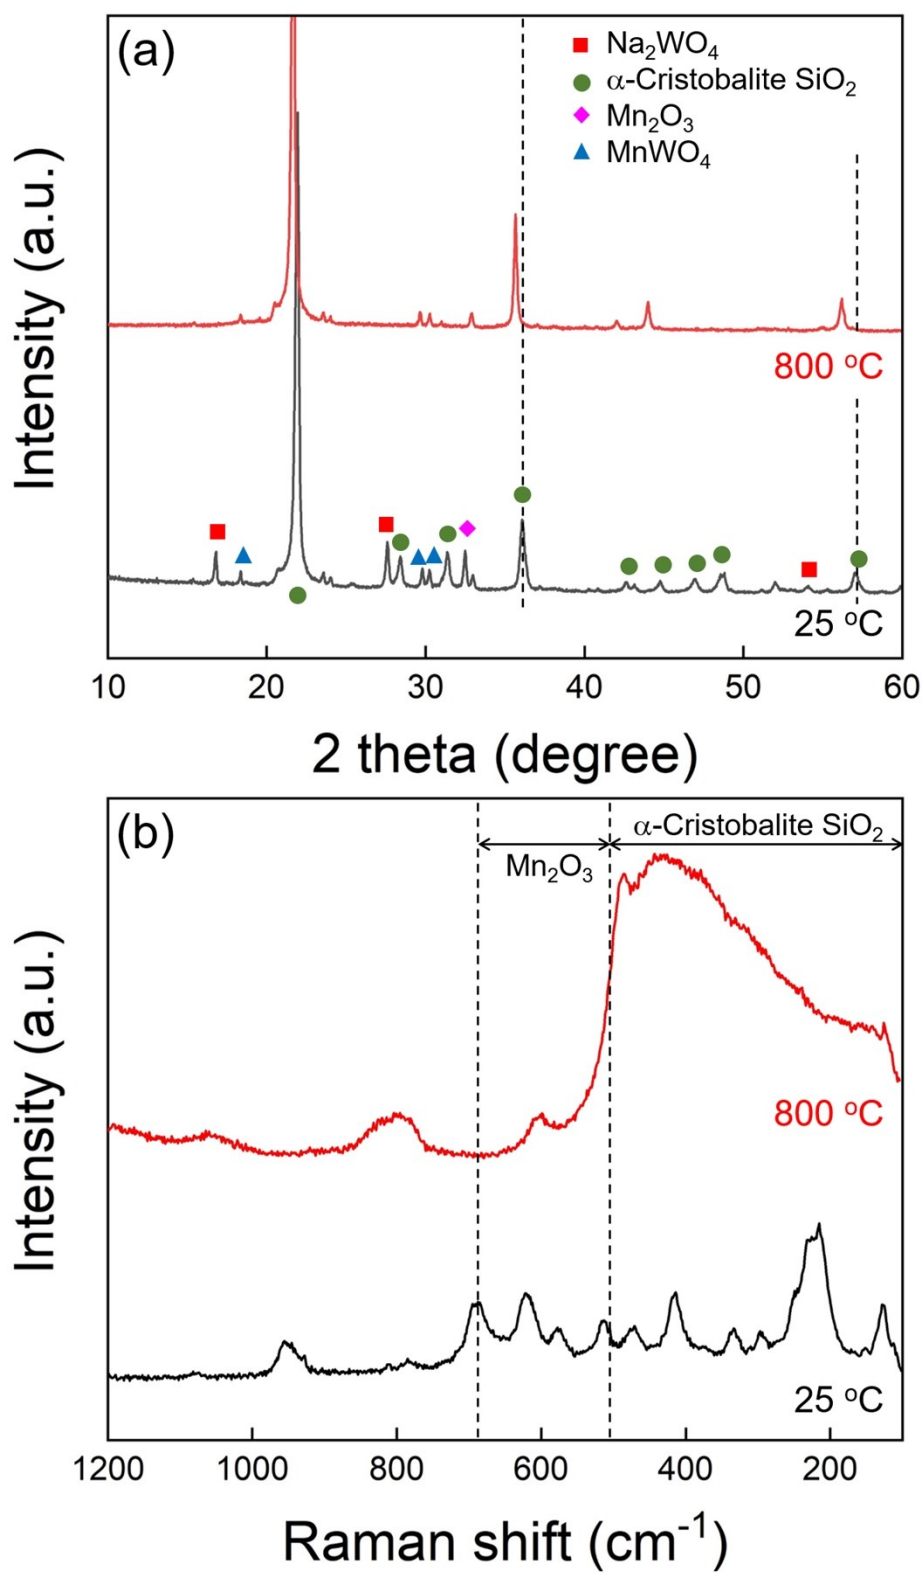

Fig. S8. (a) XRD and (b) Raman spectra of catalysts depending on the heating temperature. The results of fresh catalysts at room temperature depicted for comparison.

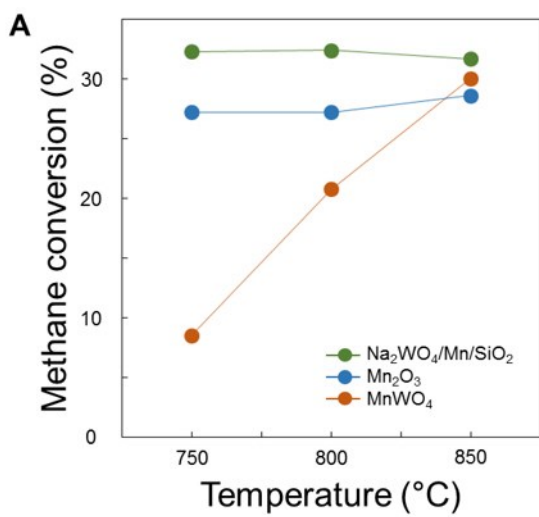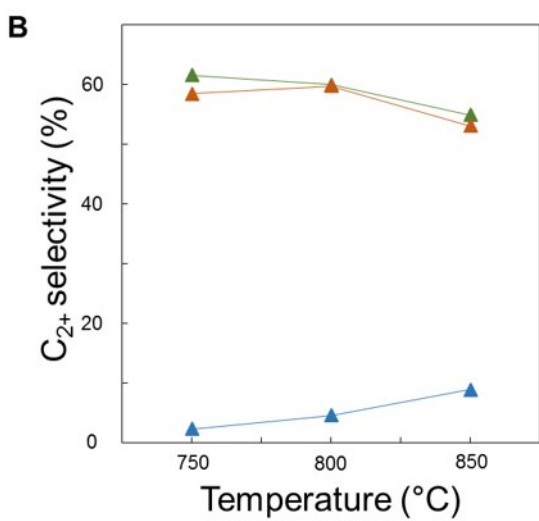

Fig. S9. Activities of various catalysts for the OCM reaction in terms of (a) CH<sub>4</sub> conversion and (b) C<sub>2+</sub> selectivity. CH<sub>4</sub>/O<sub>2</sub> = 3 mol/mol, GHSV = 10,000 h<sup>-1</sup>.

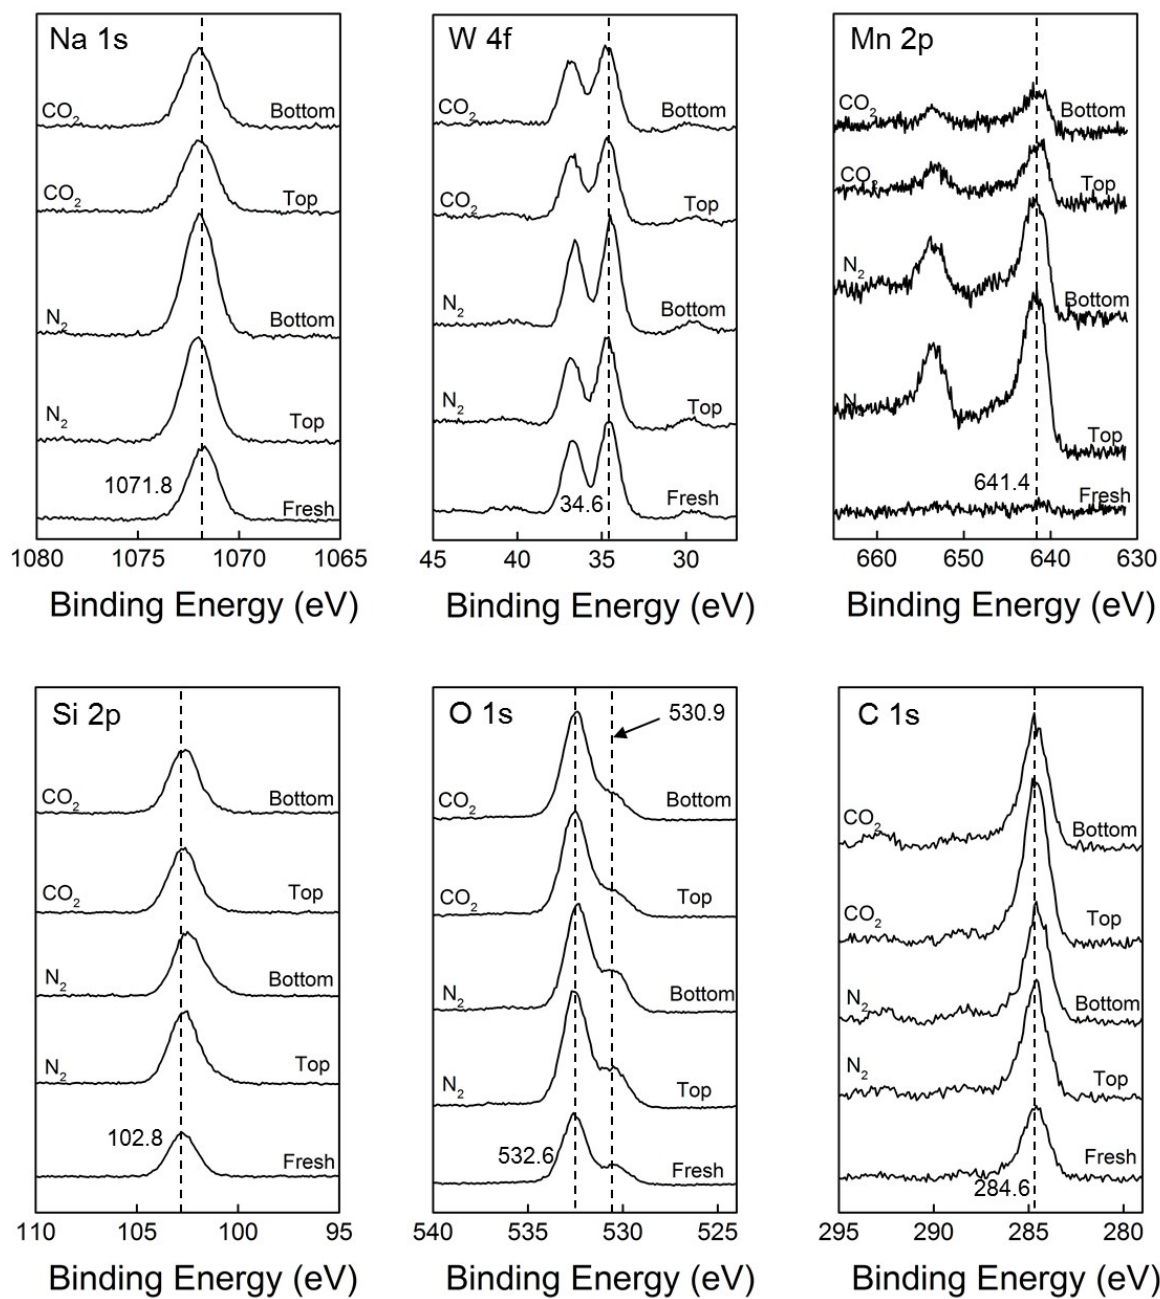

Fig. S10. XPS results of fresh and spent  $\text{Na}_2\text{WO}_4/\text{Mn}/\text{SiO}_2$  catalysts.

Table S1. OCM reaction results at various CH<sub>4</sub>/O<sub>2</sub> ratios.<sup>a</sup>

| Temperature (°C) | CH <sub>4</sub> /O <sub>2</sub><br>(mol/mol) | Conversion (%)  |                | Selectivity (%) |         | Yield (%)       |         | olefins/paraffins<br>(mol/mol) | CO/CO <sub>2</sub> (mol/mol) |
|------------------|----------------------------------------------|-----------------|----------------|-----------------|---------|-----------------|---------|--------------------------------|------------------------------|
|                  |                                              | CH <sub>4</sub> | O <sub>2</sub> | C <sub>2+</sub> | Olefins | C <sub>2+</sub> | Olefins |                                |                              |
| 750              | 1                                            | 66.9            | 100.0          | 24.5            | 18.4    | 16.4            | 12.3    | 3.0                            | 0.63                         |
|                  | 1.5                                          | 52.6            | 100.0          | 41.2            | 30.0    | 21.7            | 15.8    | 2.7                            | 0.51                         |
|                  | 2                                            | 35.4            | 78.8           | 53.4            | 33.4    | 18.9            | 11.8    | 1.7                            | 0.52                         |
|                  | 2.5                                          | 27.1            | 65.7           | 51.6            | 28.4    | 14.0            | 7.7     | 1.2                            | 0.45                         |
|                  | 3                                            | 18.2            | 54.1           | 54.1            | 24.2    | 9.8             | 4.4     | 0.8                            | 0.68                         |
|                  | 4                                            | 14.7            | 53.0           | 53.0            | 20.5    | 7.8             | 3.0     | 0.6                            | 0.95                         |
|                  | 5                                            | 11.5            | 55.0           | 60.9            | 21.4    | 7.0             | 2.4     | 0.5                            | 0.44                         |
| 6                | 9.2                                          | 60.3            | 60.3           | 19.3            | 5.6     | 1.8             | 0.5     | 0.60                           |                              |
| 800              | 1                                            | 66.7            | 100.0          | 25.6            | 20.0    | 17.1            | 13.4    | 3.6                            | 0.74                         |
|                  | 1.5                                          | 52.7            | 100.0          | 39.5            | 29.6    | 20.9            | 15.6    | 3.0                            | 0.68                         |
|                  | 2                                            | 44.0            | 100.0          | 49.0            | 35.1    | 21.5            | 15.4    | 2.5                            | 0.60                         |
|                  | 2.5                                          | 41.3            | 100.0          | 50.6            | 35.4    | 20.9            | 14.6    | 2.3                            | 0.53                         |
|                  | 3                                            | 34.2            | 100.0          | 58.5            | 38.7    | 20.0            | 13.3    | 2.0                            | 0.51                         |
|                  | 4                                            | 28.6            | 100.0          | 62.6            | 38.8    | 17.9            | 11.1    | 1.6                            | 0.48                         |
|                  | 5                                            | 24.5            | 100.0          | 66.3            | 38.7    | 16.2            | 9.5     | 1.4                            | 0.48                         |
| 6                | 20.6                                         | 100.0           | 70.8           | 40.3            | 14.6    | 8.3             | 1.3     | 0.54                           |                              |
| 850              | 1                                            | 66.2            | 100.0          | 22.2            | 18.1    | 14.7            | 12.0    | 4.4                            | 0.92                         |
|                  | 1.5                                          | 51.8            | 100.0          | 35.8            | 27.9    | 18.5            | 14.5    | 3.5                            | 0.95                         |
|                  | 2                                            | 42.6            | 100.0          | 47.2            | 35.5    | 20.1            | 15.1    | 3.0                            | 0.83                         |
|                  | 2.5                                          | 40.9            | 100.0          | 46.5            | 31.3    | 19.0            | 12.8    | 2.1                            | 0.74                         |
|                  | 3                                            | 33.5            | 100.0          | 55.3            | 38.8    | 18.5            | 13.0    | 2.4                            | 0.70                         |
|                  | 4                                            | 29.0            | 100.0          | 58.0            | 38.8    | 16.8            | 11.2    | 2.0                            | 0.68                         |
|                  | 5                                            | 23.3            | 100.0          | 67.2            | 43.4    | 15.6            | 10.1    | 1.8                            | 0.69                         |
| 6                | 20.5                                         | 100.0           | 70.0           | 43.8            | 14.3    | 9.0             | 1.7     | 0.75                           |                              |

<sup>a</sup>GHSV = 10,000 h<sup>-1</sup>. CH<sub>4</sub> flow rate was fixed at 18 mL/min, and the flow rates of O<sub>2</sub> and N<sub>2</sub> were adjusted to achieve the total flow rate of 50 mL/min.

Table S2. OCM reaction results at various contents of N<sub>2</sub> diluent.<sup>a</sup>

| Temperature (°C) | N <sub>2</sub> dilution (%) | Conversion (%)  |                | Selectivity (%) |         | Yield (%)       |         | olefins/paraffins (mol/mol) | CO/CO <sub>2</sub> (mol/mol) |
|------------------|-----------------------------|-----------------|----------------|-----------------|---------|-----------------|---------|-----------------------------|------------------------------|
|                  |                             | CH <sub>4</sub> | O <sub>2</sub> | C <sub>2+</sub> | Olefins | C <sub>2+</sub> | Olefins |                             |                              |
| 750              | 20                          | 34.5            | 100            | 59.5            | 39.8    | 20.5            | 13.7    | 2.02                        | 0.85                         |
|                  | 40                          | 29.4            | 86.1           | 62.1            | 36.4    | 18.2            | 10.7    | 1.42                        | 0.48                         |
|                  | 50                          | 18.2            | 52.9           | 54.1            | 22.4    | 9.8             | 4.1     | 0.71                        | 0.37                         |
|                  | 60                          | 11.8            | 37.9           | 52.7            | 16.5    | 6.2             | 2.0     | 0.46                        | 0.39                         |
|                  | 80                          | 7.3             | 18.2           | 37.7            | 7.1     | 2.8             | 0.5     | 0.23                        | 0.30                         |
| 800              | 20                          | 34.4            | 100            | 56.5            | 39.3    | 19.5            | 13.6    | 2.28                        | 0.93                         |
|                  | 40                          | 34.3            | 100            | 59.7            | 40.1    | 20.5            | 13.8    | 2.05                        | 0.80                         |
|                  | 50                          | 35.2            | 100            | 59.7            | 39.6    | 21.0            | 14.0    | 1.97                        | 0.63                         |
|                  | 60                          | 35.9            | 100            | 60.1            | 39.1    | 21.5            | 14.0    | 1.87                        | 0.48                         |
|                  | 80                          | 20.3            | 57.7           | 64.4            | 30.1    | 13.1            | 6.1     | 0.88                        | 0.37                         |
| 850              | 20                          | 31.1            | 100            | 53.3            | 39.5    | 17.4            | 12.9    | 2.86                        | 1.13                         |
|                  | 40                          | 32.4            | 100            | 58.2            | 41.6    | 18.9            | 13.5    | 2.51                        | 1.10                         |
|                  | 50                          | 34.6            | 100            | 56.2            | 39.5    | 19.4            | 13.6    | 2.35                        | 0.89                         |
|                  | 60                          | 35.2            | 100            | 56.9            | 39.2    | 20.0            | 13.8    | 2.22                        | 0.73                         |
|                  | 80                          | 34.9            | 100            | 61.3            | 39.9    | 21.4            | 13.9    | 1.86                        | 0.49                         |

<sup>a</sup>CH<sub>4</sub>/O<sub>2</sub> = 3 mol/mol, GHSV = 10,000 h<sup>-1</sup>.

Table S3. OCM reaction results at various GHSV adjusted by the catalyst bed thickness.<sup>a</sup>

| Temperature (°C) | Catalyst bed thickness (mm) | GHSV (h <sup>-1</sup> ) | Conversion (%)  |                | Selectivity (%) |         | Yield (%)       |         | olefins/paraffins (mol/mol) | CO/CO <sub>2</sub> (mol/mol) |
|------------------|-----------------------------|-------------------------|-----------------|----------------|-----------------|---------|-----------------|---------|-----------------------------|------------------------------|
|                  |                             |                         | CH <sub>4</sub> | O <sub>2</sub> | C <sub>2+</sub> | Olefins | C <sub>2+</sub> | Olefins |                             |                              |
| 750              | 2.1                         | 50,000                  | 2.9             | 9.4            | 38.8            | 5.2     | 1.1             | 0.2     | 0.15                        | 0.61                         |
|                  | 2.65                        | 40,000                  | 4.4             | 13.8           | 40.2            | 6.8     | 1.8             | 0.3     | 0.20                        | 0.33                         |
|                  | 3.5                         | 30,000                  | 5.4             | 20.4           | 51.6            | 11.9    | 2.8             | 0.6     | 0.30                        | 0.47                         |
|                  | 4.2                         | 25,000                  | 12.7            | 31.6           | 50.8            | 18.7    | 6.4             | 2.4     | 0.58                        | 0.51                         |
|                  | 5.3                         | 20,000                  | 35.9            | 100.0          | 55.1            | 36.3    | 19.7            | 13.0    | 1.94                        | 0.67                         |
|                  | 7.1                         | 15,000                  | 35.2            | 100.0          | 57.7            | 38.3    | 20.3            | 13.5    | 1.98                        | 0.69                         |
|                  | 10.6                        | 10,000                  | 34.1            | 100.0          | 59.7            | 39.8    | 20.4            | 13.6    | 2.02                        | 0.85                         |
|                  | 21.2                        | 5,000                   | 34.3            | 100.0          | 59.8            | 40.6    | 20.5            | 14.0    | 2.12                        | 0.69                         |
|                  | 35.3                        | 3,000                   | 34.5            | 100.0          | 58.9            | 39.7    | 20.4            | 13.7    | 2.06                        | 0.72                         |
| 800              | 2.1                         | 50,000                  | 14.5            | 34.0           | 63.3            | 28.4    | 9.2             | 4.1     | 0.81                        | 0.81                         |
|                  | 2.65                        | 40,000                  | 33.2            | 99.2           | 56.6            | 38.6    | 18.8            | 12.8    | 2.14                        | 1.03                         |
|                  | 3.5                         | 30,000                  | 34.4            | 100.0          | 57.2            | 39.9    | 19.7            | 13.7    | 2.30                        | 0.92                         |
|                  | 4.2                         | 25,000                  | 33.3            | 100.0          | 56.7            | 39.1    | 18.9            | 13.0    | 2.22                        | 0.92                         |
|                  | 5.3                         | 20,000                  | 35.4            | 100.0          | 56.0            | 38.6    | 19.8            | 13.7    | 2.23                        | 0.88                         |
|                  | 7.1                         | 15,000                  | 35.5            | 100.0          | 55.6            | 38.3    | 19.7            | 13.6    | 2.21                        | 0.89                         |
|                  | 10.6                        | 10,000                  | 33.9            | 100.0          | 57.1            | 39.6    | 19.3            | 13.4    | 2.28                        | 0.93                         |
|                  | 21.2                        | 5,000                   | 34.0            | 100.0          | 56.9            | 40.8    | 19.3            | 13.9    | 2.54                        | 0.83                         |
|                  | 35.3                        | 3,000                   | 33.1            | 100.0          | 59.0            | 41.5    | 19.5            | 13.7    | 2.37                        | 0.92                         |
| 850              | 2.1                         | 50,000                  | 33.9            | 100.0          | 52.5            | 38.3    | 17.8            | 13.0    | 2.69                        | 1.24                         |
|                  | 2.65                        | 40,000                  | 32.3            | 100.0          | 53.0            | 38.4    | 17.1            | 12.4    | 2.63                        | 1.28                         |
|                  | 3.5                         | 30,000                  | 34.4            | 100.0          | 52.3            | 38.5    | 18.0            | 13.2    | 2.77                        | 1.16                         |
|                  | 4.2                         | 25,000                  | 33.0            | 100.0          | 50.9            | 37.4    | 16.8            | 12.3    | 2.77                        | 1.23                         |
|                  | 5.3                         | 20,000                  | 34.4            | 100.0          | 52.5            | 38.6    | 18.0            | 13.3    | 2.77                        | 1.16                         |
|                  | 7.1                         | 15,000                  | 34.7            | 100.0          | 51.0            | 37.3    | 17.7            | 12.9    | 2.72                        | 1.18                         |
|                  | 10.6                        | 10,000                  | 32.3            | 100.0          | 53.4            | 39.6    | 17.3            | 12.8    | 2.86                        | 1.13                         |
|                  | 21.2                        | 5,000                   | 32.1            | 100.0          | 52.2            | 41.3    | 16.8            | 13.3    | 3.78                        | 0.89                         |
|                  | 35.3                        | 3,000                   | 32.3            | 100.0          | 52.2            | 39.8    | 16.9            | 12.8    | 3.19                        | 1.06                         |

<sup>a</sup>CH<sub>4</sub>/O<sub>2</sub>/N<sub>2</sub> = 3/1/1 mol/mol/mol, total feed flow rate = 50 mL/min.

Table S4. O<sub>2</sub> consumption for the selectivity at various\_GHSV adjusted by the catalyst bed thickness.<sup>a</sup>

| Temperature (°C) | Catalyst bed thickness (mm) | GHSV (h <sup>-1</sup> ) | Conversion (%)  |                | O <sub>2</sub> -consumption (%) for |                 |                               |                               |                               |                               |
|------------------|-----------------------------|-------------------------|-----------------|----------------|-------------------------------------|-----------------|-------------------------------|-------------------------------|-------------------------------|-------------------------------|
|                  |                             |                         | CH <sub>4</sub> | O <sub>2</sub> | CO                                  | CO <sub>2</sub> | C <sub>2</sub> H <sub>4</sub> | C <sub>2</sub> H <sub>6</sub> | C <sub>3</sub> H <sub>6</sub> | C <sub>3</sub> H <sub>8</sub> |
| 750              | 2.1                         | 50,000                  | 2.9             | 9.4            | 3.0                                 | 6.6             | 0.2                           | 0.8                           | 0.00                          | 0.00                          |
|                  | 2.65                        | 40,000                  | 4.4             | 13.8           | 3.6                                 | 14.4            | 0.4                           | 1.1                           | 0.01                          | 0.00                          |
|                  | 3.5                         | 30,000                  | 5.4             | 20.4           | 4.5                                 | 12.8            | 1.0                           | 1.6                           | 0.00                          | 0.00                          |
|                  | 4.2                         | 25,000                  | 12.7            | 31.6           | 7.8                                 | 20.5            | 3.4                           | 3.0                           | 0.21                          | 0.10                          |
|                  | 5.3                         | 20,000                  | 35.9            | 100.0          | 28.4                                | 56.5            | 17.8                          | 4.8                           | 1.74                          | 0.31                          |
|                  | 7.1                         | 15,000                  | 35.2            | 100.0          | 29.2                                | 56.6            | 18.4                          | 4.9                           | 1.84                          | 0.30                          |
|                  | 10.6                        | 10,000                  | 34.1            | 100.0          | 29.7                                | 47.4            | 18.5                          | 4.9                           | 1.92                          | 0.28                          |
|                  | 21.2                        | 5,000                   | 34.3            | 100.0          | 31.0                                | 59.5            | 18.8                          | 4.8                           | 2.10                          | 0.26                          |
|                  | 35.3                        | 3,000                   | 34.5            | 100.0          | 31.1                                | 55.4            | 18.2                          | 4.7                           | 2.00                          | 0.25                          |
| 800              | 2.1                         | 50,000                  | 14.5            | 34.0           | 21.5                                | 33.0            | 11.0                          | 4.6                           | 1.03                          | 0.17                          |
|                  | 2.65                        | 40,000                  | 33.2            | 99.2           | 35.0                                | 45.2            | 17.3                          | 4.4                           | 1.87                          | 0.16                          |
|                  | 3.5                         | 30,000                  | 34.4            | 100.0          | 35.4                                | 51.6            | 18.6                          | 4.4                           | 1.97                          | 0.18                          |
|                  | 4.2                         | 25,000                  | 33.3            | 100.0          | 33.8                                | 49.2            | 17.6                          | 4.3                           | 1.95                          | 0.17                          |
|                  | 5.3                         | 20,000                  | 35.4            | 100.0          | 34.6                                | 52.1            | 18.5                          | 4.5                           | 2.01                          | 0.19                          |
|                  | 7.1                         | 15,000                  | 35.5            | 100.0          | 34.2                                | 51.0            | 18.3                          | 4.5                           | 2.02                          | 0.19                          |
|                  | 10.6                        | 10,000                  | 33.9            | 100.0          | 35.0                                | 51.3            | 18.1                          | 4.3                           | 2.08                          | 0.16                          |
|                  | 21.2                        | 5,000                   | 34.0            | 100.0          | 34.5                                | 55.7            | 18.5                          | 4.0                           | 2.26                          | 0.13                          |
|                  | 35.3                        | 3,000                   | 33.1            | 100.0          | 35.7                                | 53.1            | 18.0                          | 4.1                           | 2.17                          | 0.13                          |
| 850              | 2.1                         | 50,000                  | 33.9            | 100.0          | 42.2                                | 45.8            | 17.2                          | 3.6                           | 1.96                          | 0.07                          |
|                  | 2.65                        | 40,000                  | 32.3            | 100.0          | 41.0                                | 42.6            | 16.7                          | 3.5                           | 1.94                          | 0.06                          |
|                  | 3.5                         | 30,000                  | 34.4            | 100.0          | 40.7                                | 46.7            | 17.8                          | 3.6                           | 2.05                          | 0.08                          |
|                  | 4.2                         | 25,000                  | 33.0            | 100.0          | 40.5                                | 44.0            | 16.6                          | 3.3                           | 1.97                          | 0.06                          |
|                  | 5.3                         | 20,000                  | 34.4            | 100.0          | 41.2                                | 47.4            | 17.8                          | 3.6                           | 2.07                          | 0.07                          |
|                  | 7.1                         | 15,000                  | 34.7            | 100.0          | 40.9                                | 46.1            | 17.4                          | 3.5                           | 2.04                          | 0.07                          |
|                  | 10.6                        | 10,000                  | 32.3            | 100.0          | 40.9                                | 48.3            | 17.2                          | 3.3                           | 2.08                          | 0.05                          |
|                  | 21.2                        | 5,000                   | 32.1            | 100.0          | 38.3                                | 57.1            | 17.7                          | 2.6                           | 2.20                          | 0.03                          |
|                  | 35.3                        | 3,000                   | 32.3            | 100.0          | 40.0                                | 53.7            | 17.2                          | 2.8                           | 2.13                          | 0.02                          |

<sup>a</sup>CH<sub>4</sub>/O<sub>2</sub>/N<sub>2</sub> = 3/1/1 mol/mol/mol, total feed flow rate = 50 mL/min.



Table S5. OCM reaction results at various GHSV adjusted by the total feed flow rate.<sup>a</sup>

| Temperature<br>(°C) | Feed flow rate<br>(mL/min) | GHSV (h <sup>-1</sup> ) | Conversion (%)  |                | Selectivity (%) |         | Yield (%)       |         | olefins/paraffins<br>(mol/mol) | CO/CO <sub>2</sub><br>(mol/mol) |
|---------------------|----------------------------|-------------------------|-----------------|----------------|-----------------|---------|-----------------|---------|--------------------------------|---------------------------------|
|                     |                            |                         | CH <sub>4</sub> | O <sub>2</sub> | C <sub>2+</sub> | Olefins | C <sub>2+</sub> | Olefins |                                |                                 |
| 750                 | 90.0                       | 30,000                  | 3.1             | 13.4           | 50.1            | 6.1     | 1.6             | 0.2     | 0.14                           | 0.54                            |
|                     | 60.0                       | 20,000                  | 6.7             | 20.4           | 41.6            | 7.8     | 2.8             | 0.5     | 0.23                           | 0.38                            |
|                     | 44.9                       | 15,000                  | 9.5             | 29.5           | 51.5            | 15.1    | 4.9             | 1.4     | 0.41                           | 0.49                            |
|                     | 30.0                       | 10,000                  | 16.4            | 51.3           | 55.8            | 23.3    | 9.1             | 3.8     | 0.72                           | 0.36                            |
|                     | 15.0                       | 5,000                   | 26.1            | 89.1           | 58.4            | 33.3    | 15.2            | 8.7     | 1.33                           | 0.39                            |
| 800                 | 90.0                       | 30,000                  | 31.1            | 100            | 63.6            | 41.7    | 19.8            | 13.0    | 1.90                           | 1.25                            |
|                     | 60.0                       | 20,000                  | 35.5            | 100            | 59.2            | 39.1    | 21.0            | 13.9    | 1.94                           | 0.79                            |
|                     | 44.9                       | 15,000                  | 35.4            | 100            | 59.3            | 39.2    | 21.0            | 13.9    | 1.95                           | 0.60                            |
|                     | 30.0                       | 10,000                  | 32.6            | 100            | 64.2            | 42.1    | 20.9            | 13.7    | 1.91                           | 0.51                            |
|                     | 15.0                       | 5,000                   | 30.1            | 100            | 60.7            | 40.0    | 18.3            | 12.1    | 1.94                           | 0.45                            |
| 850                 | 90.0                       | 30,000                  | 31.1            | 100            | 60.9            | 43.0    | 18.9            | 13.4    | 2.41                           | 1.60                            |
|                     | 60.0                       | 20,000                  | 34.7            | 100            | 56.5            | 39.4    | 19.6            | 13.7    | 2.30                           | 1.16                            |
|                     | 44.9                       | 15,000                  | 33.9            | 100            | 59.1            | 41.3    | 20.0            | 14.0    | 2.32                           | 0.87                            |
|                     | 30.0                       | 10,000                  | 31.1            | 100            | 63.5            | 43.8    | 19.7            | 13.6    | 2.23                           | 0.68                            |
|                     | 15.0                       | 5,000                   | 28.5            | 100            | 59.5            | 42.6    | 16.9            | 12.1    | 2.51                           | 0.57                            |

<sup>a</sup>CH<sub>4</sub>/O<sub>2</sub>/N<sub>2</sub> = 3/1/1 mol/mol/mol, volume of catalyst = 0.18 mL.

Table S6. O<sub>2</sub> consumption for the selectivity at various GHSV adjusted by the total feed flow rate.<sup>a</sup>

| Temperature (°C) | Feed flow rate (mL/min) | GHSV (h <sup>-1</sup> ) | Conversion (%)  |                | O <sub>2</sub> -consumption (%) for |                 |                               |                               |                               |                               |
|------------------|-------------------------|-------------------------|-----------------|----------------|-------------------------------------|-----------------|-------------------------------|-------------------------------|-------------------------------|-------------------------------|
|                  |                         |                         | CH <sub>4</sub> | O <sub>2</sub> | CO                                  | CO <sub>2</sub> | C <sub>2</sub> H <sub>4</sub> | C <sub>2</sub> H <sub>6</sub> | C <sub>3</sub> H <sub>6</sub> | C <sub>3</sub> H <sub>8</sub> |
| 750              | 90.0                    | 30,000                  | 3.1             | 13.4           | 2.9                                 | 7.1             | 0.3                           | 1.0                           | -                             | -                             |
|                  | 60.0                    | 20,000                  | 6.7             | 20.4           | 4.6                                 | 16.2            | 0.8                           | 1.7                           | -                             | -                             |
|                  | 44.9                    | 15,000                  | 9.5             | 29.5           | 6.8                                 | 18.5            | 2.1                           | 2.6                           | 0.1                           | -                             |
|                  | 30.0                    | 10,000                  | 16.4            | 51.3           | 10.2                                | 38.0            | 5.4                           | 3.9                           | 0.3                           | 0.2                           |
|                  | 15.0                    | 5,000                   | 26.1            | 89.1           | 14.7                                | 50.1            | 12.0                          | 4.7                           | 1.0                           | 0.3                           |
| 800              | 90.0                    | 30,000                  | 31.1            | 100            | 37.9                                | 40.4            | 17.7                          | 5.0                           | 1.8                           | 0.2                           |
|                  | 60.0                    | 20,000                  | 35.5            | 100            | 27.4                                | 46.2            | 19.0                          | 5.2                           | 1.8                           | 0.2                           |
|                  | 44.9                    | 15,000                  | 35.4            | 100            | 22.5                                | 49.6            | 19.1                          | 5.1                           | 1.8                           | 0.3                           |
|                  | 30.0                    | 10,000                  | 32.6            | 100            | 20.4                                | 53.8            | 18.8                          | 5.2                           | 1.8                           | 0.3                           |
|                  | 15.0                    | 5,000                   | 30.1            | 100            | 17.7                                | 52.4            | 16.4                          | 4.5                           | 1.7                           | 0.2                           |
| 850              | 90.0                    | 30,000                  | 31.1            | 100            | 43.4                                | 36.2            | 18.2                          | 4.1                           | 1.9                           | 0.1                           |
|                  | 60.0                    | 20,000                  | 34.7            | 100            | 35.3                                | 40.6            | 18.6                          | 4.4                           | 1.9                           | 0.1                           |
|                  | 44.9                    | 15,000                  | 33.9            | 100            | 29.3                                | 44.8            | 19.0                          | 4.4                           | 2.0                           | 0.1                           |
|                  | 30.0                    | 10,000                  | 31.1            | 100            | 25.5                                | 49.8            | 18.5                          | 4.5                           | 2.0                           | 0.1                           |
|                  | 15.0                    | 5,000                   | 28.5            | 100            | 23.0                                | 53.5            | 16.3                          | 3.6                           | 1.9                           | 0.1                           |

<sup>a</sup>CH<sub>4</sub>/O<sub>2</sub>/N<sub>2</sub> = 3/1/1 mol/mol/mol, volume of catalyst = 0.18 mL.

Table S7. OCM results with co-fed CO<sub>2</sub> at various GHSV and catalyst bed thickness.<sup>a</sup>

| Temperature (°C) | Catalyst bed thickness (mm) | GHSV (h <sup>-1</sup> ) | Conversion (%)  |                | Selectivity (%) |         | Yield (%)       |         | olefins/paraffins (mol/mol) | CO/CO <sub>2</sub> (mol/mol) |
|------------------|-----------------------------|-------------------------|-----------------|----------------|-----------------|---------|-----------------|---------|-----------------------------|------------------------------|
|                  |                             |                         | CH <sub>4</sub> | O <sub>2</sub> | C <sub>2+</sub> | Olefins | C <sub>2+</sub> | Olefins |                             |                              |
| 750              | 2.1                         | 50,000                  | 2.4             | 9.0            | 52.9            | 7.4     | 1.3             | 0.2     | 0.16                        | 2.12                         |
|                  | 2.65                        | 40,000                  | 5.0             | 16.6           | 53.0            | 11.4    | 2.7             | 0.6     | 0.26                        | 0.98                         |
|                  | 3.5                         | 30,000                  | 5.4             | 19.6           | 59.8            | 14.9    | 3.2             | 0.8     | 0.32                        | 0.74                         |
|                  | 4.2                         | 25,000                  | 11.6            | 33.4           | 58.9            | 21.1    | 6.8             | 2.4     | 0.54                        | 0.64                         |
|                  | 5.3                         | 20,000                  | 34.0            | 100            | 59.7            | 39.5    | 20.3            | 13.4    | 1.86                        | 0.74                         |
|                  | 7.1                         | 15,000                  | 33.9            | 100            | 59.5            | 39.9    | 20.2            | 13.5    | 1.87                        | 0.79                         |
|                  | 10.6                        | 10,000                  | 33.0            | 100            | 61.9            | 41.2    | 20.4            | 13.6    | 1.88                        | 0.94                         |
|                  | 21.2                        | 5,000                   | 34.3            | 100            | 60.7            | 40.8    | 20.8            | 14.0    | 1.94                        | 0.85                         |
|                  | 35.3                        | 3,000                   | 34.5            | 100            | 58.1            | 41.9    | 20.0            | 14.5    | 1.95                        | 0.73                         |
| 800              | 2.1                         | 50,000                  | 33.0            | 97.1           | 57.1            | 39.3    | 18.8            | 13.0    | 2.06                        | 1.18                         |
|                  | 2.65                        | 40,000                  | 33.0            | 98.3           | 58.2            | 40.0    | 19.2            | 13.2    | 2.05                        | 1.23                         |
|                  | 3.5                         | 30,000                  | 33.2            | 100            | 58.7            | 40.7    | 19.5            | 13.5    | 2.09                        | 1.03                         |
|                  | 4.2                         | 25,000                  | 33.5            | 100            | 58.2            | 40.1    | 19.5            | 13.4    | 2.04                        | 1.00                         |
|                  | 5.3                         | 20,000                  | 33.6            | 100            | 58.6            | 40.6    | 19.7            | 13.6    | 2.09                        | 0.95                         |
|                  | 7.1                         | 15,000                  | 33.8            | 100            | 57.6            | 39.9    | 19.5            | 13.5    | 2.07                        | 1.00                         |
|                  | 10.6                        | 10,000                  | 33.0            | 100            | 58.7            | 40.7    | 19.4            | 13.4    | 2.08                        | 1.15                         |
|                  | 21.2                        | 5,000                   | 32.9            | 100            | 58.5            | 41.4    | 19.2            | 13.6    | 2.21                        | 1.11                         |
|                  | 35.3                        | 3,000                   | 32.5            | 100            | 56.9            | 40.6    | 18.5            | 13.2    | 2.28                        | 1.08                         |
| 850              | 2.1                         | 50,000                  | 32.8            | 99.2           | 57.5            | 41.9    | 18.9            | 13.7    | 2.45                        | 1.63                         |
|                  | 2.65                        | 40,000                  | 33.2            | 99.6           | 56.3            | 41.2    | 18.7            | 13.7    | 2.48                        | 1.84                         |
|                  | 3.5                         | 30,000                  | 34.4            | 100            | 56.1            | 41.1    | 19.3            | 14.1    | 2.49                        | 1.43                         |
|                  | 4.2                         | 25,000                  | 32.4            | 100            | 54.5            | 39.8    | 17.7            | 12.9    | 2.45                        | 1.38                         |
|                  | 5.3                         | 20,000                  | 31.8            | 100            | 55.7            | 41.2    | 17.7            | 13.1    | 2.56                        | 1.08                         |
|                  | 7.1                         | 15,000                  | 32.1            | 100            | 54.4            | 40.1    | 17.5            | 12.9    | 2.53                        | 1.28                         |
|                  | 10.6                        | 10,000                  | 30.8            | 100            | 56.0            | 41.6    | 17.2            | 12.8    | 2.61                        | 1.61                         |
|                  | 21.2                        | 5000                    | 31.0            | 100            | 53.8            | 41.5    | 16.7            | 12.9    | 3.01                        | 1.45                         |
|                  | 35.3                        | 3000                    | 30.8            | 100            | 51.1            | 40.6    | 15.7            | 12.5    | 3.40                        | 1.23                         |

<sup>a</sup>CH<sub>4</sub>/O<sub>2</sub>/N<sub>2</sub> = 3/1/1 mol/mol/mol, feed flow rate = 50 mL/min.

Table S8. O<sub>2</sub> consumption for the selectivity with co-fed CO<sub>2</sub> at various GHSV adjusted by the catalyst bed thickness.<sup>a</sup>

| Temperature (°C) | Catalyst bed thickness (mm) | GHSV (h <sup>-1</sup> ) | Conversion (%)  |                | O <sub>2</sub> -consumption (%) for |                 |                               |                               |                               |                               |
|------------------|-----------------------------|-------------------------|-----------------|----------------|-------------------------------------|-----------------|-------------------------------|-------------------------------|-------------------------------|-------------------------------|
|                  |                             |                         | CH <sub>4</sub> | O <sub>2</sub> | CO                                  | CO <sub>2</sub> | C <sub>2</sub> H <sub>4</sub> | C <sub>2</sub> H <sub>6</sub> | C <sub>3</sub> H <sub>6</sub> | C <sub>3</sub> H <sub>8</sub> |
| 750              | 2.1                         | 50,000                  | 2.4             | 9.0            | 3.3                                 | 2.1             | 0.3                           | 0.8                           | 0.00                          | 0.00                          |
|                  | 2.65                        | 40,000                  | 5.0             | 16.6           | 4.7                                 | 11.1            | 0.7                           | 1.4                           | 0.03                          | 0.00                          |
|                  | 3.5                         | 30,000                  | 5.4             | 19.6           | 5.2                                 | 9.3             | 1.2                           | 1.8                           | 0.05                          | 0.03                          |
|                  | 4.2                         | 25,000                  | 11.6            | 33.4           | 8.2                                 | 17.1            | 3.5                           | 3.2                           | 0.20                          | 0.11                          |
|                  | 5.3                         | 20,000                  | 34.0            | 100            | 28.2                                | 50.9            | 18.3                          | 4.9                           | 1.84                          | 0.29                          |
|                  | 7.1                         | 15,000                  | 33.9            | 100            | 28.9                                | 49.1            | 18.2                          | 4.9                           | 2.10                          | 0.17                          |
|                  | 10.6                        | 10,000                  | 33.0            | 100            | 31.6                                | 45.1            | 19.2                          | 5.1                           | 2.00                          | 0.28                          |
|                  | 21.2                        | 5,000                   | 34.3            | 100            | 30.3                                | 47.2            | 19.0                          | 4.9                           | 2.06                          | 0.26                          |
|                  | 35.3                        | 3,000                   | 34.5            | 100            | 31.9                                | 58.0            | 19.5                          | 5.0                           | 2.20                          | 0.26                          |
| 800              | 2.1                         | 50,000                  | 33.0            | 97.1           | 36.0                                | 32.6            | 17.8                          | 5.9                           | 1.78                          | 0.21                          |
|                  | 2.65                        | 40,000                  | 33.0            | 98.3           | 35.9                                | 43.6            | 19.0                          | 4.5                           | 1.98                          | 0.19                          |
|                  | 3.5                         | 30,000                  | 33.2            | 100            | 35.1                                | 45.2            | 18.8                          | 4.1                           | 2.04                          | 0.18                          |
|                  | 4.2                         | 25,000                  | 33.5            | 100            | 38.0                                | 50.8            | 19.3                          | 4.7                           | 2.10                          | 0.17                          |
|                  | 5.3                         | 20,000                  | 33.6            | 100            | 34.0                                | 47.6            | 18.4                          | 4.4                           | 2.06                          | 0.16                          |
|                  | 7.1                         | 15,000                  | 33.8            | 100            | 33.9                                | 45.3            | 18.2                          | 4.4                           | 2.07                          | 0.16                          |
|                  | 10.6                        | 10,000                  | 33.0            | 100            | 35.7                                | 40.3            | 18.6                          | 4.5                           | 2.15                          | 0.16                          |
|                  | 21.2                        | 5,000                   | 32.9            | 100            | 35.4                                | 44.7            | 19.0                          | 4.3                           | 2.28                          | 0.14                          |
|                  | 35.3                        | 3,000                   | 32.5            | 100            | 34.4                                | 49.4            | 18.3                          | 4.0                           | 2.24                          | 0.12                          |
| 850              | 2.1                         | 50,000                  | 32.8            | 99.2           | 45.8                                | 35.5            | 18.5                          | 3.8                           | 2.13                          | 0.07                          |
|                  | 2.65                        | 40,000                  | 33.2            | 99.6           | 43.9                                | 36.2            | 18.3                          | 3.7                           | 2.12                          | 0.07                          |
|                  | 3.5                         | 30,000                  | 34.4            | 100            | 43.8                                | 40.8            | 19.0                          | 3.8                           | 2.23                          | 0.07                          |
|                  | 4.2                         | 25,000                  | 32.4            | 100            | 44.0                                | 45.2            | 18.2                          | 3.7                           | 2.11                          | 0.07                          |
|                  | 5.3                         | 20,000                  | 31.8            | 100            | 35.9                                | 44.4            | 17.6                          | 3.4                           | 2.09                          | 0.06                          |
|                  | 7.1                         | 15,000                  | 32.1            | 100            | 41.1                                | 42.6            | 17.3                          | 3.4                           | 2.06                          | 0.06                          |
|                  | 10.6                        | 10,000                  | 30.8            | 100            | 42.4                                | 36.9            | 17.8                          | 3.4                           | 2.16                          | 0.05                          |
|                  | 21.2                        | 5,000                   | 31.0            | 100            | 41.6                                | 43.7            | 18.7                          | 3.1                           | 2.33                          | 0.04                          |
|                  | 35.3                        | 3,000                   | 30.8            | 100            | 41.0                                | 51.2            | 17.9                          | 2.6                           | 2.26                          | 0.01                          |

<sup>a</sup>CH<sub>4</sub>/O<sub>2</sub>/N<sub>2</sub> = 3/1/1 mol/mol/mol, feed flow rate = 50 mL/min.

Table S9. Observed XPS binding energies (eV) and near-surface compositions (atom%) of the Na<sub>2</sub>WO<sub>4</sub>/Mn/SiO<sub>2</sub> catalysts.

| Catalysts <sup>a</sup>                            | Na 1s   |       | W 4f    |       | Mn 2p   |       | Si 2p   |       | O 1s    |       | C 1s    |       | Na/W<br>(atom/atom) |
|---------------------------------------------------|---------|-------|---------|-------|---------|-------|---------|-------|---------|-------|---------|-------|---------------------|
|                                                   | BE (eV) | atom% |                     |
| Fresh catalyst                                    | 1071.8  | 8.17  | 34.6    | 2.19  | 641.4   | 0.19  | 102.8   | 23.19 | 532.5   | 51.72 | 284.6   | 14.97 | 3.7                 |
| With N <sub>2</sub> only (top) <sup>b</sup>       | 1072.1  | 7.48  | 34.7    | 1.17  | 641.6   | 2.55  | 102.7   | 24.35 | 532.5   | 53.89 | 284.6   | 10.56 | 6.4                 |
| With N <sub>2</sub> only (bottom) <sup>b</sup>    | 1071.9  | 8.81  | 34.4    | 1.41  | 641.6   | 2.03  | 102.5   | 22.17 | 532.4   | 52.24 | 284.6   | 13.34 | 6.2                 |
| With CO <sub>2</sub> co-fed (top) <sup>b</sup>    | 1072.0  | 5.91  | 34.6    | 1.24  | 641.2   | 1.18  | 102.7   | 22.46 | 532.5   | 51.38 | 284.6   | 17.84 | 4.8                 |
| With CO <sub>2</sub> co-fed (bottom) <sup>b</sup> | 1072.0  | 6.53  | 34.7    | 1.34  | 641.4   | 0.61  | 102.7   | 23.51 | 532.5   | 53.55 | 284.6   | 14.46 | 4.9                 |

<sup>a</sup>5 wt% of Na<sub>2</sub>WO<sub>4</sub> and 2 wt% of Mn for all catalysts.

<sup>b</sup>Spent catalysts.
